# Supplementary material
Source: PubMed Central journal article supplement (PMC6143091)
Supplement: jamapsychiatry-75-844-s001.pdf [file jamapsychiatry-75-844-s001.pdf]

## Supplementary Online Content

Hemager N, Plessen KJ, Thorup A, et al. Assessment of neurocognitive functions in 7-year-old children at familial high risk of schizophrenia or bipolar disorder in the Danish High Risk and Resilience Study VIA 7. *JAMA Psychiatry*. Published online June 20, 2018. doi:10.1001/jamapsychiatry.2018.1415

**eMethods.** Participants and Principal Component Analysis

**eTable 1.** Neurocognitive Functions, Tests, and A Priori Selected Variables

**eTable 2.** Observed Raw Scores of 7-Year-Old FHR-SZ, FHR-BP, and Control Offspring on Neurocognitive Measures

**eFigure.** Data Extraction and Recruitment Procedure of the VIA 7 Cohort

**eReferences.**

This supplementary material has been provided by the authors to give readers additional information about their work.

## **eMethods. Participants and Principal Component Analysis**

### **I. Participants**

#### **Specification of the included ICD-8 and ICD-10 codes of Schizophrenia spectrum psychosis**

##### ICD-8 diagnoses included:

295 Schizophrenia  
297 Paranoid states  
298.29 Other psychoses, Reactive confusion  
298.39 Other psychoses, Acute paranoid reaction  
298.89 Other psychoses, Reactive psychosis  
298.99 Other psychoses, Reactive psychosis, unspecified

##### ICD-10 diagnoses included:

F20 Schizophrenia  
F22 Persistent delusional disorders  
F25 Schizoaffective disorders

#### **Specification of the included ICD-8 and ICD-10 codes of bipolar affective disorder**

##### ICD-8 diagnoses included:

296.19 Manic-depressive psychosis, manic type  
296.39 Manic depressive psychosis, circular type

##### ICD-10 diagnoses included:

F30 Manic episode  
F31 Bipolar affective disorder

#### **Differences between participating and non-participating families**

The sample was drawn from the national population of children who were seven years old in the study period and who had parents with schizophrenia or bipolar disorder together with matched control children (Figure 1). The mothers of the participating children were slightly but non-significantly older (0.4 years) compared to the mothers of the non-participating children. The fathers of the participating children were slightly and significantly older (0.5 years,  $P = .045$ ) compared to the fathers of non-participating children with an age difference of 0.1 years ( $P = .92$ ) in the FHR-SZ group, 1.8 years ( $P = .01$ ) in the FHR-BP group, and 0.8 years ( $P = .04$ ) in the control group. A significantly higher proportion of the participating families lived in densely populated areas (46.6% among participating versus 29.3% among non-participating families,  $P < .001$ ). This pattern was exactly the same in the three study groups. Logistic problems most likely explained why fewer families from rural areas chose to take part.

### **II. Principal Component Analysis**

To reduce the number of variables principal component analysis was conducted on the 23 neurocognitive z-scores. Factors with an eigenvalue  $>1$  and scree plots were examined to identify the appropriate number of factors. Factorial invariance was confirmed separately in the three groups. Oblimin rotation with Kaiser normalization was applied. Bartlett's test of sphericity ( $p < 0.0001$ ) was significant and the relatively high Kaiser-Meyer-Olkin measure of sampling adequacy ( $KMO=0.9$ ) supported factor analysis as a valid method for structure detection. Four factors were identified and considered conceptually interpretable in terms of neurocognitive domains. The four factors cumulatively explained 47% of the total variance. Factor scores were constructed as the sum of the factor coefficients (loadings) times the standardized neurocognitive test scores.

**eTable 1. Neurocognitive Functions, Tests, and a Priori Selected Variables**

| Neurocognitive Function | Tests (Test Battery)                                   | A Priori Selected Test Variables                                                  |
|-------------------------|--------------------------------------------------------|-----------------------------------------------------------------------------------|
| Verbal Intelligence     | Guess What (RIST)                                      | Total correct responses                                                           |
| Nonverbal Intelligence  | Odd-Item Out (RIST)                                    | Total number of correctly designated drawings/pictures                            |
| Processing Speed        | Coding (WISC-IV)                                       | Total number correct                                                              |
| Processing Speed        | Symbol Search (WISC-IV)                                | Total number correct                                                              |
| Processing Speed        | Trail Making Test 2 - Number Sequencing (D-KEFS)       | Time to complete in seconds                                                       |
| Processing Speed        | Trail Making Test 3 - Letter Sequencing (D-KEFS)       | Time to complete in seconds                                                       |
| Sustained Attention     | Rapid Visual Information Processing (CANTAB)           | A' (A Prime) <sup>a</sup>                                                         |
| Verbal Memory           | Memory for Stories - Immediate Recall (TOMAL-2)        | Total number of units recalled over two stories                                   |
| Verbal Memory           | Memory for Stories - Delayed Recall (TOMAL-2)          | Total number of units recalled over two stories                                   |
| Verbal Memory           | Word Selective Reminding - Immediate Recall (TOMAL-2)  | Total number of words recalled over six learning trials                           |
| Verbal Memory           | Word Selective Reminding - Delayed Recall (TOMAL-2)    | Total number of words recalled in one trial                                       |
| Visuospatial Memory     | Spatial Recognition Memory (CANTAB)                    | Percent Correct <sup>b</sup>                                                      |
| Visuospatial Memory     | RCFT - Immediate recall                                | Total number correct                                                              |
| Flexibility/Set Shift   | Intra-Extra Dimensional Set Shift (CANTAB)             | Extra-Dimensional Stage Errors <sup>c</sup>                                       |
| Flexibility/Set Shift   | Trail Making Test 4 - Number-Letter Switching (D-KEFS) | Time to complete in seconds                                                       |
| Flexibility/Set Shift   | Verbal Fluency 3 Switching (D-KEFS)                    | Total number of correct switching between categories in 60 seconds <sup>d</sup>   |
| Planning                | Stockings of Cambridge (CANTAB)                        | Problems Solved in Minimum Moves                                                  |
| Verbal working memory   | Arithmetic (WISC-IV)                                   | Total correct responses                                                           |
| Verbal working memory   | Letter-Number Sequencing (WISC-IV)                     | Number of correct trials                                                          |
| Visual working memory   | Spatial Span (CANTAB)                                  | Span Length <sup>e</sup>                                                          |
| Visual working memory   | Spatial Working Memory (CANTAB)                        | Total Errors <sup>f</sup>                                                         |
| Verbal Fluency          | Verbal Fluency 1 Phonemic (D-KEFS)                     | Total number of words beginning with F, A, and S named in 60 seconds respectively |
| Verbal Fluency          | Verbal Fluency 2 Semantic (D-KEFS)                     | Total number of animals named in 60 seconds                                       |

RIST = Reynold's Intellectual Screening test<sup>1</sup>; WISC-IV = Wechsler Intelligence Scale for Children - fourth edition<sup>2</sup>; D-KEFS = Delis-Kaplan Executive Function System<sup>3</sup>; CANTAB = Cambridge Neuropsychological Test Automated Battery<sup>4</sup>; TOMAL-2 = Test of Memory and Learning – Second Edition<sup>5</sup>; RCFT = Rey Complex Figure Test and Recognition Trial<sup>6</sup>.

<sup>a</sup> A prime measures target sensitivity

<sup>b</sup> Number of correct responses, expressed as a percentage

<sup>c</sup> Extra-Dimensional Stage Errors denotes the errors made in the extra-dimensional stage of the task, where the child is required to make an extra-dimensional shift

<sup>d</sup> The categories in the Danish version of the subtest Verbal Fluency 3 Switching are 1) furniture and 2) fruit

<sup>e</sup> Span length denotes the longest sequence successfully recalled by the child (three attempts at each level)

<sup>f</sup> Total errors comprise the number of times a box is selected that is certain not to contain a blue token and therefore should not have been visited by the child

**eTable 2. Observed Raw Scores of 7-Year-Old FHR-SZ, FHR-BP and Control Offspring on Neurocognitive Measures**

| Test Variable                                     | Total N | 1. Controls (N=200) |     | 2. FHR-SZ (N=202) |     | 3. FHR-BP (N=120) |     |
|---------------------------------------------------|---------|---------------------|-----|-------------------|-----|-------------------|-----|
|                                                   |         | Mean (SD)           | N   | Mean (SD)         | N   | Mean (SD)         | N   |
| SOC, Problems Solved in Minimum Moves             | 511     | 6.44 (1.64)         | 198 | 6.18 (1.65)       | 195 | 6.53 (1.88)       | 118 |
| SRM, Percent Correct                              | 511     | 71.64 (11.36)       | 198 | 67.21 (12.93)     | 195 | 70.34 (10.47)     | 118 |
| SSP, Span Length                                  | 510     | 4.77 (1.05)         | 198 | 4.41 (1.24)       | 194 | 4.93 (1.25)       | 118 |
| SWM, Total Errors                                 | 510     | 47.03 (15.35)       | 198 | 51.49 (15.84)     | 194 | 49.17 (17.15)     | 118 |
| RVP, A'                                           | 496     | 0.91 (0.05)         | 193 | 0.89 (0.06)       | 187 | 0.90 (0.06)       | 116 |
| Guess What, Total Correct                         | 518     | 33.74 (4.10)        | 199 | 32.38 (5.97)      | 200 | 33.13 (4.27)      | 119 |
| Coding, Total Correct                             | 516     | 29.43 (7.32)        | 199 | 26.30 (7.76)      | 199 | 28.68 (7.14)      | 118 |
| Symbol Search, Total Correct                      | 508     | 17.38 (5.29)        | 194 | 15.34 (5.37)      | 196 | 17.48 (4.86)      | 118 |
| Arithmetic, Total Correct                         | 512     | 13.75 (2.86)        | 199 | 12.68 (3.40)      | 196 | 13.91 (3.31)      | 117 |
| MFS Immediate Recall, Total Correct               | 512     | 20.04 (9.37)        | 198 | 19.38 (10.04)     | 196 | 20.70 (9.91)      | 118 |
| MFS Delayed Recall, Total Correct                 | 509     | 15.58 (8.35)        | 197 | 14.92 (9.15)      | 195 | 16.99 (9.24)      | 117 |
| Verbal Fluency Phonemic, Total Correct            | 503     | 14.18 (6.04)        | 195 | 13.01 (6.53)      | 193 | 14.15 (6.26)      | 115 |
| Verbal Fluency Semantic, Total Correct            | 502     | 26.21 (6.46)        | 195 | 24.35 (6.23)      | 192 | 25.37 (6.50)      | 115 |
| Verbal Fluency Switching, Total Switching Correct | 480     | 6.03 (2.56)         | 186 | 5.61 (2.61)       | 183 | 6.33 (2.24)       | 111 |
| RCFT Immediate Recall, Total Correct              | 499     | 9.75 (5.76)         | 194 | 7.64 (5.05)       | 188 | 9.50 (5.69)       | 117 |
| IED, Extra-Dimensional Stage Errors               | 511     | 19.27 (10.14)       | 198 | 17.85 (10.10)     | 195 | 18.65 (10.45)     | 118 |
| Odd-Item Out, Total Correct                       | 517     | 63.40 (8.94)        | 198 | 62.17 (9.30)      | 200 | 63.87 (8.59)      | 119 |
| Letter-Number Sequencing, Total Correct           | 511     | 13.73 (3.62)        | 198 | 12.44 (4.06)      | 196 | 13.92 (3.81)      | 117 |
| WSR Immediate Recall, Total Correct               | 506     | 39.08 (4.91)        | 198 | 38.62 (5.68)      | 191 | 39.47 (4.87)      | 117 |
| WSR Delayed Recall, Total Correct                 | 501     | 6.25 (1.61)         | 195 | 6.08 (1.97)       | 191 | 6.39 (1.53)       | 115 |
| TMT Numbers, Seconds                              | 515     | 58.9 (22.40)        | 196 | 67.83 (28.26)     | 201 | 62.65 (26.73)     | 118 |
| TMT Letters, Seconds                              | 515     | 74.88 (34.61)       | 196 | 85.89 (38.48)     | 201 | 77.47 (36.20)     | 118 |
| TMT Switching, Seconds)                           | 507     | 168.93 (53.58)      | 195 | 190.62 (51.49)    | 195 | 175.87 (51.26)    | 117 |

Abbreviations: SOC = Stockings of Cambridge; SRM = Spatial Recognition Memory; SSP = Spatial Span; SWM = Spatial Working Memory; RVP = Rapid Visual Information Processing; MFS = Memory for Stories; RCFT = Rey Complex Figure Test and Recognition Trial; IED = Intra-Extra Dimensional Set shift; WSR = Word Selective Reminding; TMT = Trail Making Test.

**eFigure 1. Data Extraction and Recruitment Procedure of the VIA 7 Cohort**

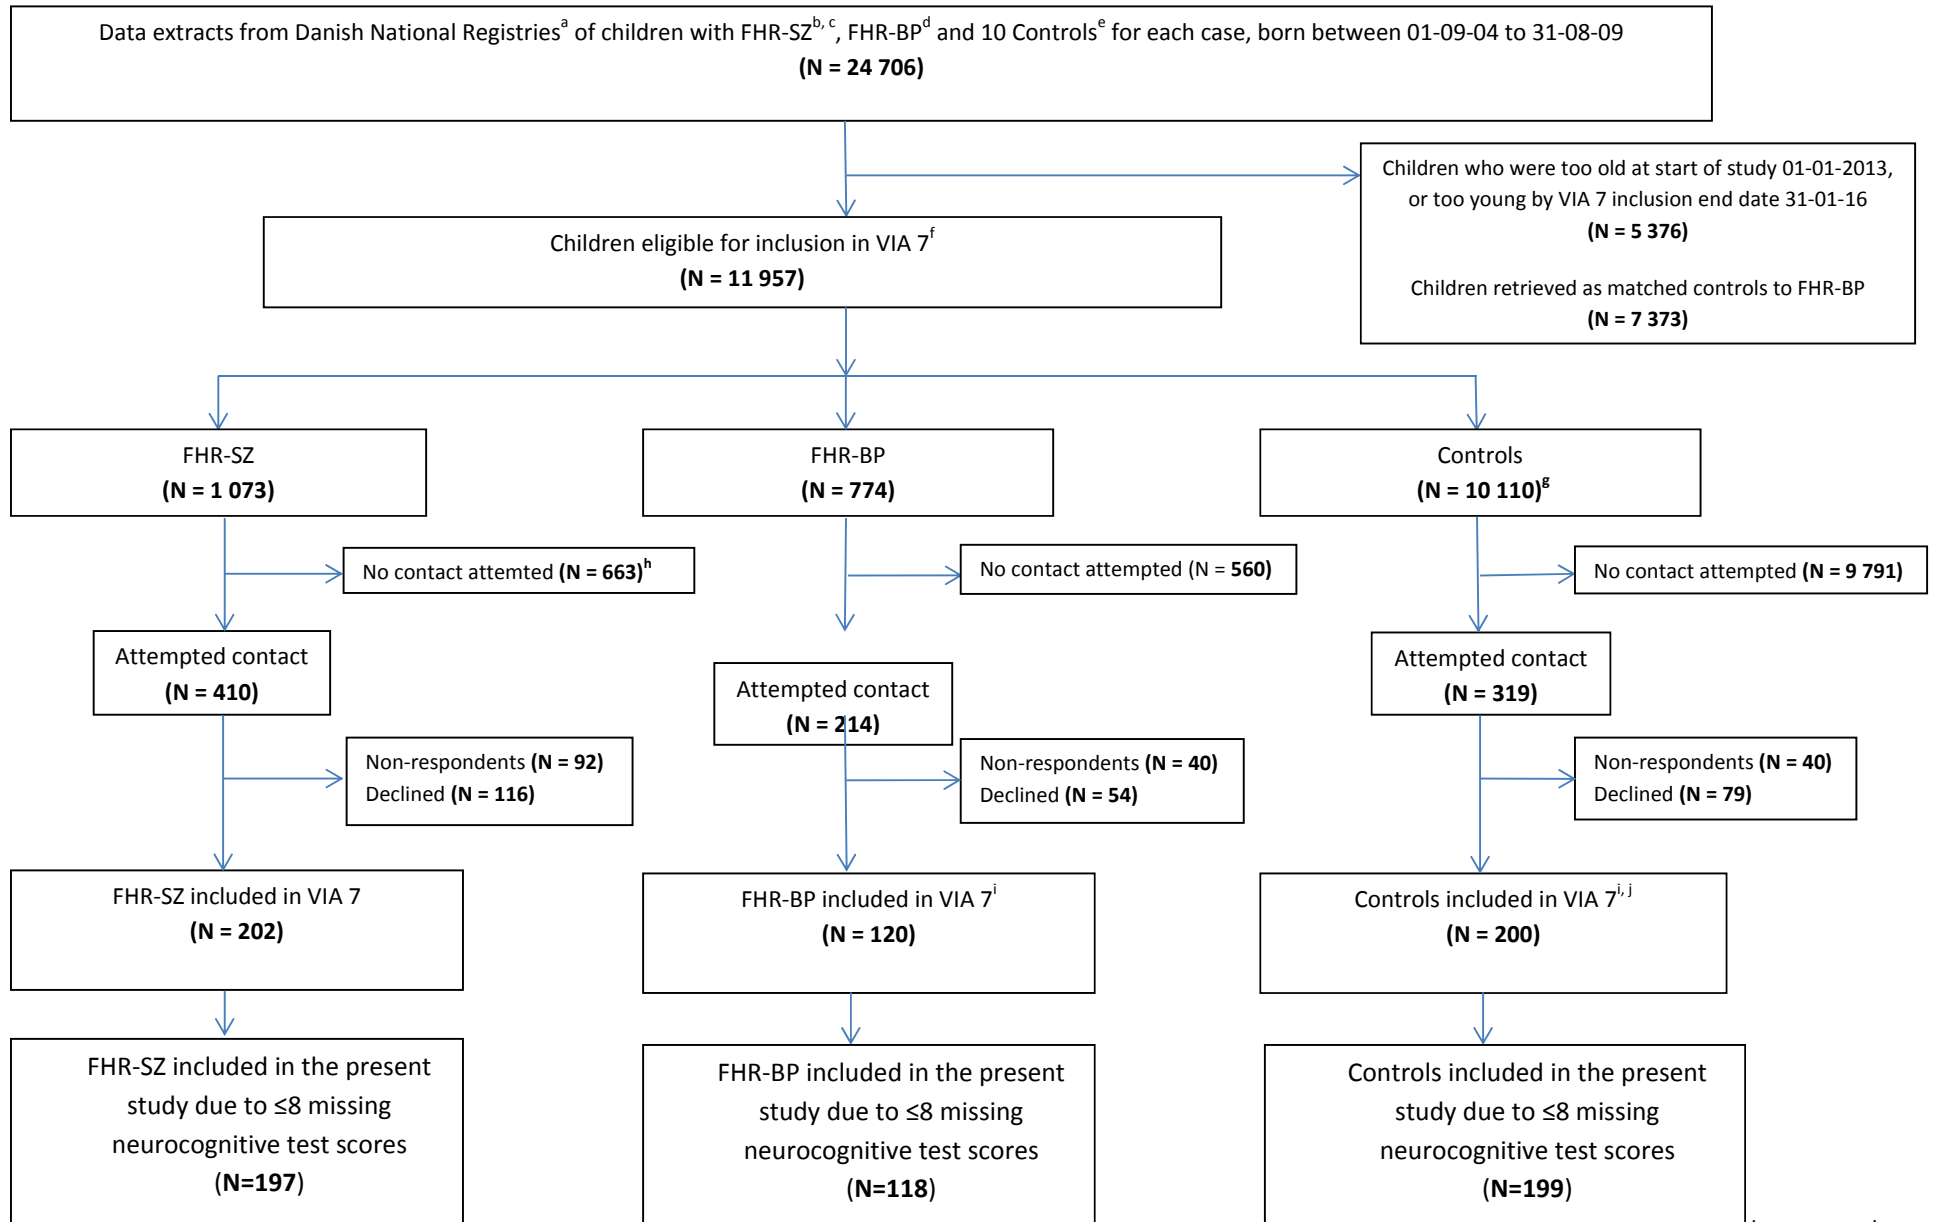

<sup>a</sup> **Danish National Registries:** Danish Civil Registration System and Danish Psychiatric Central Research Register.

<sup>b</sup> **FHR-SZ:** Children at familial high risk of schizophrenia spectrum disorders.

<sup>c</sup> **Double diagnosed parents:** Parents with diagnoses of schizophrenia and bipolar disorder were assigned to the schizophrenia high risk group as per the ICD-10 hierarchy.

<sup>d</sup> **FHR-BP:** Children at familial high risk of bipolar disorder.

<sup>e</sup> **Controls:** Population-based control children of parents with no diagnoses of schizophrenia spectrum disorders or bipolar disorder.

<sup>f</sup> **Research protection:** During part of the data collection period, approximately 20% of the families were registered as protected from being approached for research purposes (due to legislation enacted in May, 2011). Consequently, there were eligible children who were not contacted and enrolled in the VIA 7.

<sup>g</sup> **Controls selection:** A total of 10 controls were retrieved for each child in the FHR-SZ group and the FHR-BP group. Controls were matched to cases on sex, municipality and exact age. The original intent was to only select control cases that were matched to children at FHR-SZ. However, there are 38 FHR-BP-matched controls among the 200 total controls.

<sup>h</sup> **Definition of contact:** Initially, by letters sent to the child's address. If the family did not respond, contact by telephone was attempted (calls and text messages).

<sup>i</sup> **Re-assigned control parent:** One control parent had been diagnosed with bipolar disorder by a private psychiatrist. The diagnosis was not in the national registry extract, as private doctors do not report to the national registry. This family/parent was reassigned to the FHR-BP group. Therefore, the N=201 for controls is now N=200.

<sup>j</sup> **Control children not in the extract:** Two younger siblings were included in the VIA 7 by request of the parents. They were not in the original extract.

#### Reference List

- (1) Reynolds CR, Kamphaus RW. *Reynolds Intellectual Assessment Scales (RIAS)*. Lutz, FL: Psychological Assessment Resources Inc., 2003.
- (2) Wechsler D. *Wechsler Intelligence Scale for Children - Fourth Edition (WISC-IV)*. San Antonio, TX: The Psychological Corporation, 2003.
- (3) Delis DC, Kaplan E, Kramer JH. *Delis-Kaplan Executive Function System*. San Antonio, TX: Psychological Corporation, 2001.
- (4) Sahakian BJ, Owen AM. Computerized assessment in neuropsychiatry using CANTAB: discussion paper. *J R Soc Med* 1992;85:399-402.
- (5) Reynolds CR, Voress JK. *Test of Memory and Learning - Second Edition (TOMAL-2)*. Austin, TX: Pro-Ed Inc., 2007.
- (6) Meyers JE, Meyers KR. *Rey Complex Figure Test and Recognition Trial*. Odessa, FL: Psychological Assessment Resources, 1995.
